# Supplementary material
Source: publisher site journal article supplement (https://www.dovepress.com/article/558997)
Supplement: Supplementary file 1 [file 558997%20Revised%20%252509Supplementary_file.docx]

**Table S1:** Variance inflation factor (VIF) values for covariates included in Model 2 and Model 3 (partially and fully adjusted models).

| **Variable** | **VIF of Model 2** | **VIF of Model 3** |
| --- | --- | --- |
| **CALLY index** | 1.01 | 1.13 |
| **Age** | 1.01 | 1.18 |
| **Race/ ethnicity** | 1.12 | 1.21 |
| **Education** | 1.12 | 1.53 |
| **marital status** | — | 1.18 |
| **PIR** | — | 1.54 |
| **BMI** | — | 1.23 |
| **smoking status** | — | 1.11 |
| **Age of menarche** | — | 1.05 |
| **oral contraceptives** | — | 1.08 |
| **Mean VIF** | 1.06 | 1.22 |

**Note:** Categorized according to CALLY Quartiles. Model 1 was adjusted for none; Model 2 was adjusted for age, race/ethnicity, and education level; Model 3 was adjusted for age, race/ethnicity, education level, marital status, PIR, BMI, smoking status, age of menarche, and use of oral contraceptives.

**Abbreviation:** PIR, the ratio of income to poverty; BMI, body mass index.

**Table S2:** Sensitivity analysis using random forest imputation for missing covariates (n = 5,201)

| **Characteristic** | **Model 1** | ***p*-value** | **Model 2** | ***p*-value** | **Model 3** | ***p*-value** |
| --- | --- | --- | --- | --- | --- | --- |
|  | **OR (95% CI)** |  | **OR (95% CI)** |  | **OR (95% CI)** |  |
| **ln CALLY (continuous)** | 0.93 (0.86, 1.00) | 0.0526 | 0.88 (0.81, 0.96) | 0.0020 | 0.87 (0.79, 0.95) | 0.0025 |
| **ln CALLY** |  |  |  |  |  |  |
| Q1 | Ref |  | Ref |  | Ref |  |
| Q2 | 0.99 (0.74, 1.33) | 0.9404 | 0.91 (0.67, 1.23) | 0.5415 | 0.89 (0.66, 1.20) | 0.4481 |
| Q3 | 0.99 (0.74, 1.33) | 0.9448 | 0.86 (0.64, 1.16) | 0.3334 | 0.83 (0.61, 1.13) | 0.2401 |
| Q4 | 0.74 (0.54, 1.01) | 0.0564 | 0.61 (0.44, 0.84) | 0.0022 | 0.58 (0.40, 0.83) | 0.0026 |
| P for trend |  | 0.0782 |  | 0.0027 |  | 0.0038 |

**Notes:** Categorized according to CALLY Quartiles. Model 1 was adjusted for none; Model 2 was adjusted for age, race/ethnicity, and education level; Model 3 was adjusted for age, race/ethnicity, education level, marital status, PIR, BMI, smoking status, age of menarche, and use of oral contraceptives. Missing covariate data were imputed using the random forest method. The exposure (ln CALLY) and outcome (endometriosis status) were complete and not imputed.

**Abbreviations:** CALLY, the CRP-albumin-lymphocyte index; PIR, poverty income ratio; BMI, body mass index; OR, odds ratio; CI, confidence interval.
